# Supplementary material
Source: Springer Nature journal article supplement (https://www.springermedizin.de/resource/supplementary/12958_2010_807_MOESM3_ESM.pdf/9568892)

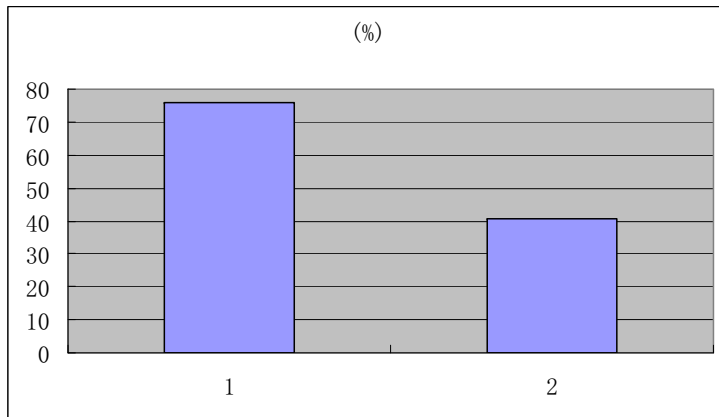

1

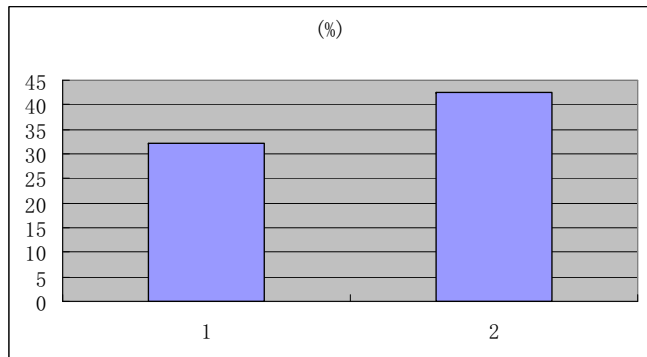

2a

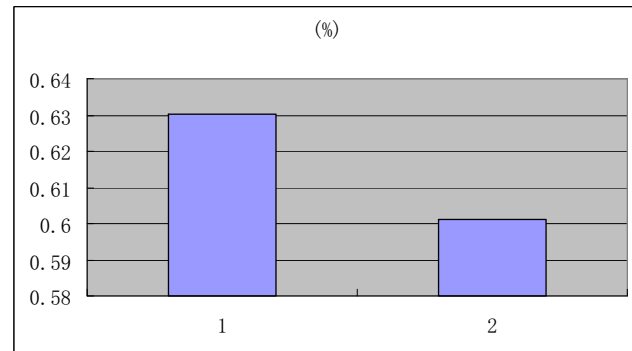

2b

Supplement: MOESM3 [file 9568892]
